# Supplementary material for: Structural Heterogeneity and Quantitative FRET Efficiency Distributions of Polyprolines through a Hybrid Atomistic Simulation and Monte Carlo Approach
Source: PLoS One. 2011 May 24;6(5):e19791. doi: 10.1371/journal.pone.0019791 (PMC3101224; doi:10.1371/journal.pone.0019791)
Supplement: Text S1 — (PDF) [file pone.0019791.s005.pdf]

## Supplementary Materials

### *Cis*-model

To calculate structural properties of the *cis*-simulations, the obtained average efficiencies were fitted to a simple geometrical model.

$$R_{\text{tot}} = \left( \frac{1}{E_{\text{tot}}} - 1 \right)^{\frac{1}{6}} \cdot R_0 \quad (24)$$

$$R_A(i, x_0) = i \cdot \frac{R_{\text{tot}}}{20} - \frac{R_{\text{tot}}}{40} - x_0 \quad [\forall i \in \{1, \dots, 20\}] \quad (25)$$

$$R_D(i, x_0) = R_{\text{tot}} - R_A(i, x_0) \quad (26)$$

$$R_x(i, x_0, \alpha) = \sqrt{R_D^2 + R_A^2 + 2 \cdot R_D \cdot R_A \cos \alpha} \quad (27)$$

Its basis is a triangle, containing donor and acceptor arm lengths  $R_D$  and  $R_A$  (Eq. 25 and 26) from the *cis*-kink at the  $i$ -th position and the angle between the two arms  $\alpha$ . The third side in the triangle is the end-to-end distance as dye separation  $R_x$  (Eq. 27). Additionally, an asymmetry  $x_0$  is added to one and subtracted from the other arm length. The all-*trans* average efficiency is used to define the length of our chain  $R_{\text{tot}}$  according to Eq. 1 in our model. The position of the kink, and thus the length of the two arms, is determined by splitting  $R_{\text{tot}}$  into 20 segments and choosing the midpoint as kink. During the fit, the parameters  $\alpha$  and  $x_0$  are optimized.

### Simulation box creation

First, the polypyrrole was aligned along the principal component of the terminal prolines (x-axis) and embedded in a box with a minimal distance of 1.5 nm to the boundaries. Then, the box vectors perpendicular to the principal component (y and z-direction) were symmetrized by applying either the larger one or a length of at least 6.2 nm to the y and z box vector length. This allows application of weak restraints to prevent rotation. Finally, the box vector in x-direction was enlarged by 1.8 nm to suppress interaction of the dyes with the periodic image of their counterpart (Fig. 2B).

### Histograms

For efficiency histograms 50 histogram bins were used, evenly spaced from 0 to 1. Additionally, a random number in the range  $\pm 0.00001$  was added to all efficiency values. This prevents problems at the bin boundaries e.g. at 0.5, where all efficiencies with equal donor and acceptor ratio are put in bin # 25. In experimental setups, the raw data exhibits the same problems, however it is usually masked by the instrument corrections.

### Persistence length calculation

Persistence length was determined from segment tangents to the chain. These tangents were defined by the vector  $C - \alpha_i$  and  $C - \alpha_i + (3 \cdot n)$  due to the periodicity of 3 in the polypyrrole II helix. The next segment corresponds to  $n = 1$  and  $n$  up to  $\frac{1}{3}$  of the chain segment count were considered. The cosines for all trajectory frames of each simulation and each valid  $n$  were calculated from which then, the persistence length was derived via Eq. 13.

### Dye parameters

see dye-params-table.txt file
